# Supplementary material
Source: ML conference proceedings conference paper supplement (https://proceedings.neurips.cc/paper_files/paper/2024/hash/e560a0b22e4432003d0dba63ff8dc457-Abstract.html)
Supplement: Supplementary file 1 [file e560a0b22e4432003d0dba63ff8dc457-Supplemental-Datasets_and_Benchmarks_Track.pdf]

---

# Supplementary Materials for MEQA: A Benchmark for Multi-hop Event-centric Question Answering with Explanations

---

Ruosen Li, Zimu Wang, Son Quoc Tran, Lei Xia, Xinya Du

Department of Computer Science, University of Texas at Dallas  
{ruosen.li, zimu.wang, lei.xia, xinya.du}@utdallas.edu

## Contents

|          |                                                         |          |
|----------|---------------------------------------------------------|----------|
| <b>1</b> | <b>Data Format</b>                                      | <b>2</b> |
| <b>2</b> | <b>Data Availability, License, and Maintenance Plan</b> | <b>2</b> |
| <b>3</b> | <b>Datasheets for the MEQA Dataset</b>                  | <b>2</b> |
| 3.1      | Motivation . . . . .                                    | 2        |
| 3.2      | Composition . . . . .                                   | 2        |
| 3.3      | Collection Process . . . . .                            | 3        |
| 3.4      | Preprocessing/Cleaning/Labeling . . . . .               | 3        |
| 3.5      | Distribution . . . . .                                  | 3        |
| 3.6      | Maintenance . . . . .                                   | 4        |

## 1 Data Format

We utilize an open and widely used data format, i.e., JSON format, for the MEQA dataset. A sample within the dataset, accompanied by the data format explanation, is shown in Listing 1.

```
1 {
2   "example_id": "dev_0_s1_3", # An unique string for each question
3   "context": "Roadside IED kills Russian major general [...]", # The
4     context of the question
5   "question": "Who died before AI-monitor reported it online?", # A
6     multi-hop event-centric question
7   "answer": "major general,local commander,lieutenant general", # The
8     answer for the question
9   "explanation": [
10    "What event contains AI-Monitor is the communicator? reported",
11    "What event is after #1 has a victim? killed",
12    "Who died in the #2? major general,local commander,lieutenant
13    general"
14  ] # A list of strings indicating the explanations (reasoning chain)
15 }
```

Listing 1: Data format for the MEQA dataset.

## 2 Data Availability, License, and Maintenance Plan

The dataset and source code for the MEQA dataset have been released to GitHub: <https://github.com/du-nlp-lab/MEQA>. We share the dataset under the MIT License (see <https://choosealicense.com/licenses/mit/>). We will actively maintain the dataset and make necessary updates to ensure its availability and quality.

## 3 Datasheets for the MEQA Dataset

We present a list of Datasheets [Geburu et al., 2021] for the MEQA dataset, synthesizing many of the other analyses we performed in this paper. Detailed data analysis can be found in Appendix F in the paper.

### 3.1 Motivation

1. For what purpose was the dataset created? *The dataset is created for multi-hop event-centric question answering (QA), a task much more challenging than entity-centric questions but overlooked by popular QA benchmarks.*
2. Who created the dataset and on behalf of which entity? *The dataset is created by Dr. Xinya Du's research group on behalf of the University of Texas at Dallas.*
3. Who funded the creation of the dataset? *The dataset is funded by Dr. Xinya Du. Appendix E in the paper describes payment details.*

### 3.2 Composition

1. What do the instances that comprise the dataset represent? *The instances that comprise the dataset include the documents, events, entities, event-centric multi-hop QA questions, answers, and explanations.*
2. How many instances are there in total? *The dataset includes 211 documents and 2,243 questions. Each question corresponds to an answer and a chain of explanations (reasoning chain). Details are in Section 5 of the paper.*
3. Does the dataset contain all possible instances or is it a sample of instances from a larger set? *The dataset contains all possible instances.*
4. What data does each instance consist of? *Each instance consists of a document, a multi-hop event-centric question, an answer, and a chain of explanation (reasoning chain).*

5. Is there a label or target associated with each instance? *Yes (the answer and explanations).*
6. Is any information missing from individual instances? *No.*
7. Are relationships between individual instances made explicit? *No.*
8. Are there recommended data splits? *Yes, we provide a recommended data split for training (1,674 questions), development (282 questions), and test sets (287 questions).*
9. Are there any errors, sources of noise, or redundancies in the dataset? *Because the dataset is human-annotated, it cannot be entirely correct. However, our MEQA dataset achieves a high quality, whose human performance is 88% on average, 92% on the upper bound, and the inter-annotator agreement is 79%.*
10. Is the dataset self-contained, or does it link to or otherwise rely on external resources? *The dataset is self-contained.*
11. Does the dataset contain data that might be considered confidential? *No.*
12. Does the dataset contain data that, if viewed directly, might be offensive, insulting, threatening, or might otherwise cause anxiety? *No.*

### 3.3 Collection Process

1. How was the data associated with each instance acquired? *The data associated with each instance was acquired from the WikiEvents dataset [Li et al., 2021].*
2. What mechanisms or procedures were used to collect the data? *We collected the documents, events, and entities from the WikiEvents dataset [Li et al., 2021]. The annotation of questions, answers, and reasoning chains followed the procedures in Section 4 of the main paper by both ChatGPT and human annotators.*
3. Who was involved in the data collection process and how were they compensated? *We hired 5 graduate student workers to annotate the dataset. Among all workers, the average hourly rate was \$15.*
4. Over what timeframe was the data collected? *The dataset was created in the end of 2023.*
5. Were any ethical review processes conducted? *No.*

### 3.4 Preprocessing/Cleaning/Labeling

- Was any preprocessing/cleaning/labeling of the data done? *No.*
- Was the “raw” data saved in addition to the preprocessed/cleaned/labeled data? *We include the “raw” data (the documents) and the labeled data in the dataset.*
- Is the software that was used to preprocess/clean/label the data available? *Not applicable.*

### 3.5 Distribution

1. Will the dataset be distributed to third parties outside of the entity on behalf of which the dataset was created? *Yes.*
2. When will the dataset be distributed? *The dataset has been released on GitHub: <https://github.com/du-nlp-lab/MEQA>.*
3. Will the dataset be distributed under a copyright or other intellectual property (IP) license, and/or under applicable terms of use (ToU)? *The dataset is distributed under the MIT license.*
4. Have any third parties imposed IP-based or other restrictions on the data associated with the instances? *No.*
5. Do any export controls or other regulatory restrictions apply to the dataset or to individual instances? *No.*

### 3.6 Maintenance

1. Who will be supporting/hosting/maintaining the dataset? *The authors of the MEQA dataset will be responsible for its maintenance.*
2. How can the owner/curator/manager of the dataset be contacted? *The owners of the dataset can be contacted via email or posting an issue on GitHub.*
3. Is there an erratum? *No.*
4. Will the dataset be updated? *Yes, the dataset will be updated if necessary (e.g., correcting errors).*
5. Will older versions of the dataset continue to be supported/hosted/maintained? *Yes, all older versions of the dataset continue to be hosted for applicable comparative studies.*
6. If others want to extend/augment/build on/contribute to the dataset, is there a mechanism for them to do so? *Yes, they can contact via email.*

### References

- Timnit Gebru, Jamie Morgenstern, Briana Vecchione, Jennifer Wortman Vaughan, Hanna Wallach, Hal Daumé III, and Kate Crawford. Datasheets for datasets. *Commun. ACM*, 64(12):86–92, nov 2021. ISSN 0001-0782. doi: 10.1145/3458723. URL <https://doi.org/10.1145/3458723>.
- Sha Li, Heng Ji, and Jiawei Han. Document-level event argument extraction by conditional generation. In *Proceedings of the 2021 Conference of the North American Chapter of the Association for Computational Linguistics: Human Language Technologies*, pages 894–908, Online, June 2021. Association for Computational Linguistics. doi: 10.18653/v1/2021.naacl-main.69. URL <https://aclanthology.org/2021.naacl-main.69>.
